# Supplementary material
Source: publisher site journal article supplement (https://www.dovepress.com/article/187151)
Supplement: Supplementary file 1 [file get_supplementary_file.php]

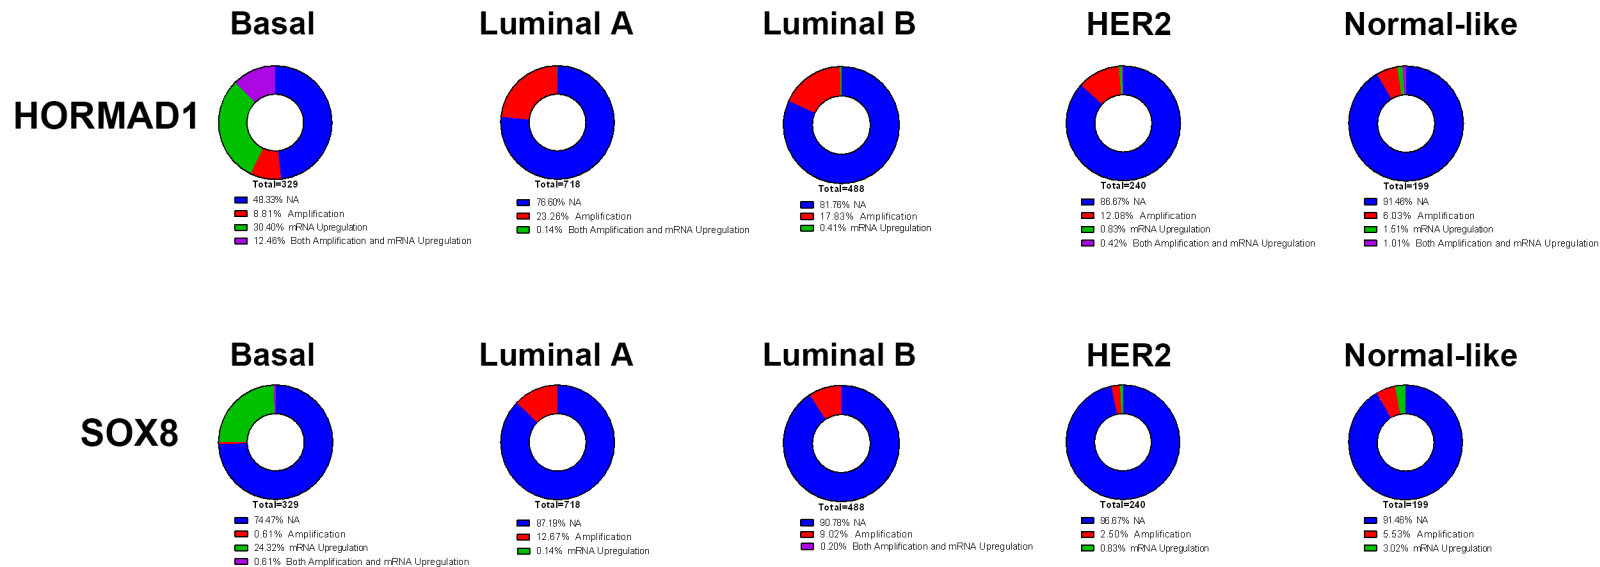

**Figure S1** HORMAD1 and SOX8 status in different subtypes of breast cancer (PAM50 classification method).

Abbreviations: HER2, human epidermal receptor 2
