# Supplementary material
Source: publisher site journal article supplement (https://www.dovepress.com/article/187151)
Supplement: Supplementary file 2 [file get_supplementary_file.php]

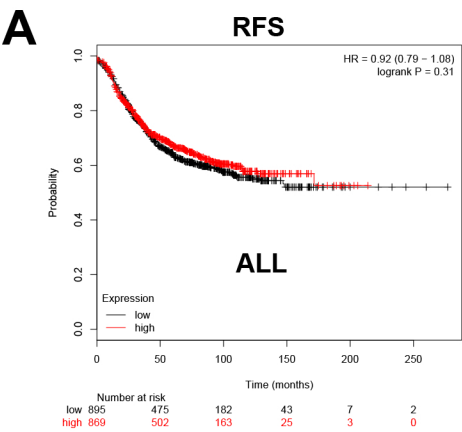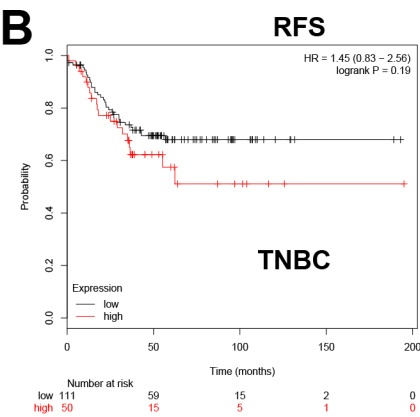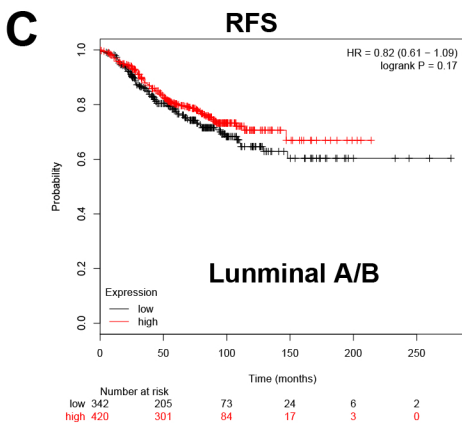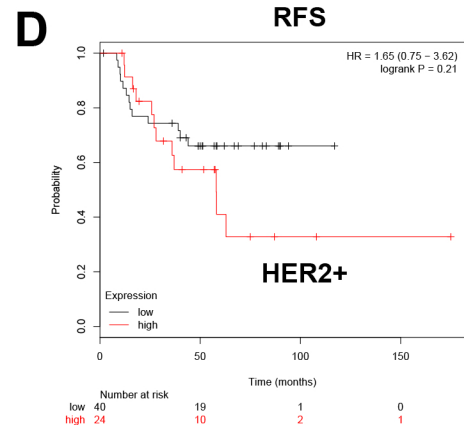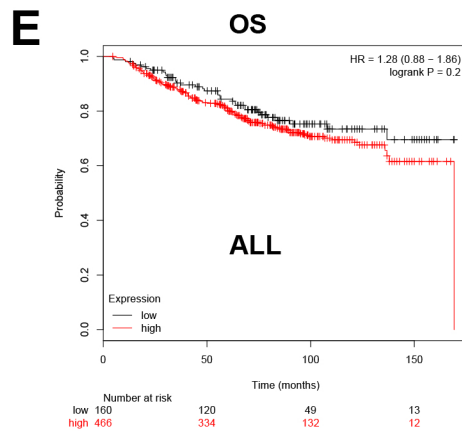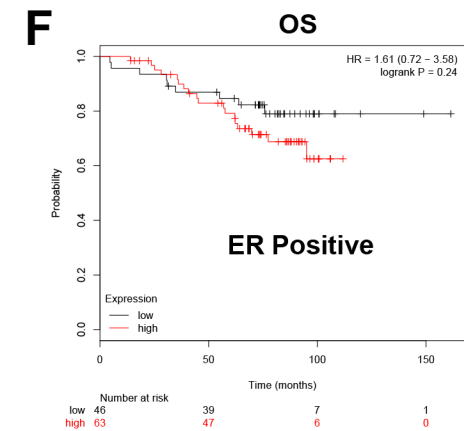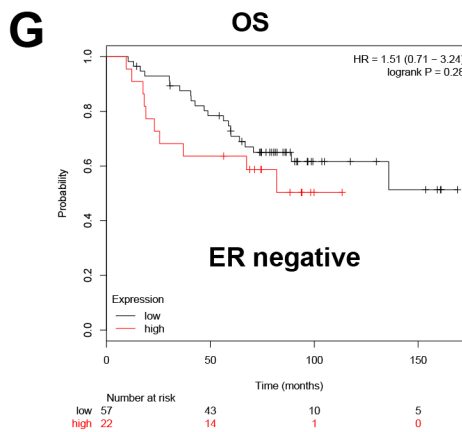

**Figure S2. Association of *SOX8* with RFS and OS in breast cancer (KM Plotter Tool cohort).**

**Notes:** Kaplan–Meier survival curves of (A) RFS for breast cancer, (B) RFS for TNBC, (C) RFS for luminal A/B, (D) RFS for HER2+ and (E) OS for breast cancer, (F) ER- positive breast cancer and (G)ER-negative breast cancer. Red line = high *SOX8* group, black line = low *SOX8* group.

The cutoff value between high and low is computed by KM Plotter Tool, and the best performing threshold is used as a cutoff. number at risk table below graph shows the number of cases that reached the endpoint (number of events), the number of cases that did not reach the endpoint (number censored) and the total number of cases.

**Abbreviations:** HER2, human epidermal receptor 2; OS, overall survival; RFS, relapse-free survival; TNBC, triple-negative breast cancer.
